# Supplementary material
Source: PubMed Central journal article supplement (PMC4628056)

## Supplemental Information

### Supplemental Tables

**Table S1. Conventional PCR primers used in SF1 and Scr 3C capture**

| <b>NAME OF ELEMENT</b> | <b>OUTSIDE PRIMER FOR NESTED PCR (5'&gt;3')</b> | <b>INSIDE PRIMER FOR NESTED PCR (5'&gt;3')</b> |
|------------------------|-------------------------------------------------|------------------------------------------------|
| <b>SCR-P</b>           | CATCGGGGCTTAACGATTTTG                           | TTTATCGGTCTGTTTCGGGG                           |
| <b>SF1</b>             | ACCCGAGCTGTCGGTTATTA                            | CTGAAATTTTCGAAAGTATGAA                         |
| <b>R1</b>              | TCGAGGGTTCCTTACCTCT                             | CGACGCAAGCACACAGA                              |
| <b>R2</b>              | CAGGAGCTAAAAATGCGTTCA                           | TTCGCAACATTTTGGCCTG                            |
| <b>R3</b>              | GAAAGGTTGCTCAGAACAGGG                           | CCGCACAAATTACATAATCACG                         |
| <b>R4</b>              | CGACAAAAGACGCCAAGACA                            | ATGCGAATGGGAGAAATGCG                           |
| <b>R5</b>              | TGAAAGGAGTTACTCGCAACT                           | TAATTTAGCAGGTCGGGCG                            |
| <b>R6</b>              | CACGATCGATCGCCAATCAT                            | GCCAAACAGGTGTGTCTGG                            |
| <b>R7</b>              | TGG CGC TCA AAA GCG TT                          | GGCCTGGCTTCGACTTTT                             |
| <b>R8</b>              | AATGTCGTATCACACAGGCG                            | GGCAATCCGTCACTCACATT                           |
| <b>R9</b>              | GCGACAAGTGTGTGCGTAG                             | GCGCTTTGCCTTTGGACAT                            |
| <b>R10</b>             | GCCTTCTATTCGGGTATCTCT                           | ATAACCACTGCAGTCGGTTAG                          |
| <b>R11</b>             | TGTCAGAAATCCACTCGAGC                            | TCCATCTCTCGATCCATCAA                           |

**Table S2. Primers for SF1-based 3C capture qPCR**

|                    |                        |
|--------------------|------------------------|
| <b>SF1</b>         | CTGAAATTTTCGAAAGTATGAA |
| <b>FTZ-P/R-2-Q</b> | TGATAATGGCCAAGAGACTT   |
| <b>FTZ-E/R-1-Q</b> | ATGCACACTTGGAAAAAGTT   |
| <b>R1-Q</b>        | CAGTCCGAGAGTATCCTTTT   |
| <b>R2-Q</b>        | ATTTTGGCCTGACTAGGG     |
| <b>R3-Q</b>        | GTGCCGCACAAATTACATA    |
| <b>R4-Q</b>        | CTTTACTGGGGCGGATCA     |
| <b>R5-Q</b>        | TGAAACAATGATGAGGTTGA   |
| <b>R6-Q</b>        | TCCAGTCGATTAAAGTGAGC   |
| <b>R7-Qd</b>       | TAACGAACGATCAGCAATTA   |
| <b>R7-Qp</b>       | CTGGACGTGGATGGATAAT    |
| <b>R8-Q</b>        | ATGGTCAGGGGTGTAATATG   |
| <b>R9-Q</b>        | GAAAAGGAGGAACTGCACA    |
| <b>R10-Q</b>       | ATCGCTTTTTTGGGAGTTCTA  |
| <b>R11-Qd</b>      | TATTTAAATCGTTCGGTTGC   |
| <b>R11-Qp</b>      | TACTTTACACGGGTTTTGTT   |
| <b>R12-Qp</b>      | TGGGTAAC TCAAACACAT    |
| <b>R12-Qd</b>      | GACGAGGGATCAGGGAAT     |

**Table S3. qPCR primers used in ftz promoter-based 3C capture**

| <b>NAME OF ELEMENT</b> | <b>OUTSIDE PRIMER FOR NESTED PCR (5'&gt;3')</b> | <b>INSIDE PRIMER FOR NESTED PCR (5'&gt;3')</b> |
|------------------------|-------------------------------------------------|------------------------------------------------|
| <b>R3</b>              | GAAAGGTTGCTCAGAACAGGG                           | CCGCACAAATTACATAATCACG                         |
| <b>R2</b>              | CAGGAGCTAAAAATGCGTTCA                           | TTCGCAACATTTTGGCCTG                            |
| <b>R1</b>              | TCGAGGGTTCCTTACCTCT                             | CGACGCAAGCACACAGA                              |
| <b>F1</b>              | CAAAGAGGCAGCGCAAACA                             | AAGCCCAAACACTCAGCTG                            |
| <b>F3</b>              | TAATTGCCCGCGTATCCTTCG                           | CCCCTTCCTCCTTCCTTCGTT                          |
| <b>F4</b>              | CATCATGCCCTTCCGTAGTCG                           | CGCCACACACTTTTCGTTACAAG                        |
| <b>F5</b>              | GTCCTTGACTGCCATAAAGTCAG                         | AGTTTCAAGAAATTCTCTGTTTCGCT                     |
| <b>SF1</b>             | ACCCGAGCTGTCGGTTATTA                            | CTGAAATTTGAAAGTATGAA                           |
| <b>SCR-1</b>           | ACGAATGACCTATGCCATTTATCT                        | CAAATCGATTTTGGGTGTGTCT                         |
| <b>SCR-P</b>           | CATCGGGGCTTAACGATTTTG                           | TTTATCGGTCTGTTTCGGGG                           |

**Table S4. Other primers used in for the *Drosophila* distance-frequency curve**

|                          |                           |
|--------------------------|---------------------------|
| CATCGCTTTTTTCGTTTCGCAT   | ATGCCCGTCTGATGACGACAA     |
| GCTTTACTCATGCCATTCTGTGT  | GTAAAAGCAAAGCCAGAATGCG    |
| GTTTGTTTACGGTTCGTAGCTGA  | GGAAGATCAGTGTTATTGCGCT    |
| CGGGTGGCTCATAGTTCATAG    | TCCTGTGGCACTTTACTAGAACTT  |
| CCATTAATTTTCGCCGCCATTT   | GTGCATACAGGCGATTGAGAA     |
| CCTGGCAAAAAGTTGAATGGGA   | CAGCCGGGCAAACCGTCTATG     |
| CCGTGTCCTTCTCAGCATTTT    | GATGTTGGCATCGGTGCTCCA     |
| GAAGTCGCGTTCGGCCAAATG    | GGGAAAGCTTGATGCAACCAT     |
| CTCTCGCTCTCGTGGTTTCCT    | CAATTGCACAGAAAAAGTTTCGCT  |
| TCGAGGATGTGAGAGTACGGAT   | CCCCGAACTGTGATAAACGGA     |
| ATTACTCAAGCATGGCACCCA    | TCTTAGAGCATTCTGAATGAAGGA  |
| GGCAATCCCTTCTATACTTTCCTT | AAATCGGGTTTTTCCTTGCCG     |
| AATTTGGAATGTGTCCCGCTG    | ACCTACACACTTGGTAGCATAATCA |
| GGCTTAATGAGTGTAAGCCACA   | CACGCGAAATGTCCGCTTACA     |
| GGTCCTAAGCAACTCCTGAAAA   | TGACTTCTTGGCAGCAATGCA     |
| CTGGGGGATACGAGTGTAAGA    | CGCCCTGGATCTGAAGACATA     |
| CCCAGCTTAAGTGCTTAACCA    | ATCTGTAGGGTTGGCCGTATT     |
| CCCGCTTATGAAATCGGCATA    | CCGTATATCTTGTTGCAGGCG     |
| TCATGGCCACGAAAATGTCCA    | GATTCGGAACCTTAGTACGTTTTCT |
| GTGGCATCGTTTTTGGTTGTTG   |                           |
| CTCACGTGTTTCTGACGTACG    |                           |
| ACGTACATATCTGGTTAAGC     |                           |
| CACCTAAATTGGGGTAACTG     |                           |
| TTAGAACCAAAAAGGAGCTGGG   |                           |
| AGTTTGCCGGTAATGTTCT      |                           |
| TAAAGGCGCTGCTTTTGCAAG    |                           |
| TAAGCTGGAAAACCTTACCTCACC |                           |
| GGATTAGTTTGAGTCCGATCAGG  |                           |
| TTTCTCCATTTTCGATCCCGAG   |                           |
| GCCAATGATCTGAACGATGCG    |                           |

**Table S5. PCR primers used for cloning STEs in enhancer-blocking transgenes**

|                      |                                     |
|----------------------|-------------------------------------|
| <b>SF2B</b>          | TGCGGCCGCCCATCCTCTTGTGAGGCTGG       |
|                      | TGCGGCCGCCTGATTGACGAATTGCGTGCG      |
| <b>R2</b>            | GAATTCGTCAATGTCAAAATCAGAC           |
|                      | TTCTGTTTTTGCTTCCAGTGTG              |
| <b>R6</b>            | GCGGCCGCGAAATAAATGAATTCTGGT         |
|                      | AGAATTCACCCGCCAATGTGT               |
| <b>R9</b>            | ATAAGAATATGCATCCCGCTCCTCGATTGTGTGAT |
|                      | ATAAGAATATGCATTGATTTGAGAGTCCGCTG    |
| <b>R10</b>           | GAATTCGAAGTCGAACTTTCGC              |
|                      | TCAATTGTGCAAAAAAAGCCA               |
| <b>1.5 kb spacer</b> | TTGCATTAAGAAGAGGTGACTG              |
|                      | GCGGCCGCTCTAGATACCGAATTT            |
| <b>attB</b>          | CCAATGCATGTCGACGATGTAGGTCACG        |
|                      | AACTGCAGTTCGGCTTGTGACATGC           |

## Supplemental Figure Legend

### Figure S1.

Photo of PCR products after electrophoresis on 2% agarose gel and stained with ethidium bromide. Right: product from 3C capture between SF1 and R1-R11, followed by nested PCR. Middle and left: PCR product from positive control 3C using ligated genomic DNA after EcoRI digestion (GCL), and negative control 3C without crosslinking (NCL).

### Figure S2

Relative frequency of 3C capture between SF1 and R-1, R1 and R2 in 4h-8h (orange bars) and 10h-14h (purple bars) embryos were quantitated by qPCR (for details see methods and Fig. 4 legend).

### Figure S3

STEs correspond to developmentally regulated chromatin domain boundary in the *Scr-Antp* genomic region. Screen crops of H3K9Me3 and H3K4Me1 ChIP-seq profile in the *Scr-Antp* region from different embryonic stages (<http://www.genome.gov/modENCODE>). EcoRI sites are shown on top. Vertical shaded bars indicate CBEs in the regions (red, SF1; orange, R1, grey R2, R6 and R10).

### Figure S4.

Binding profile of known insulator factors on STEs. Screen crop of ChIP-seq profile of several known insulator proteins at and near SF1 and STE sequences (<http://www.genome.gov/modENCODE>).

Figure S5.

*NEE-blocking in labial thoracic tissues in R2 and R6 transgenic embryos.*

Representative images of embryos from independent transgenic lines containing R2 or R6 element in the pFWNHZ transgene, stained with the anti-lacZ (**A-L**), or anti-lacZ and anti-Scr (**P-R**) RNA probes. Anterior region of embryos are shown in ventral lateral views, anterior to the left and dorsal up. **A-D**). Variation of NEE blocking levels in pFWNHZ-R2 or R6 embryos (see **M**). **E-H**). Example of strong NEE-block in pFWNHZ-R2 embryos. **I-L**). Example of strong NEE-block in pFWNHZ-R6 embryos. **M**). Quantitation of NEE-blocking in the labial thoracic tissues (gap) in embryos from multiple pFWNHZ-R2 and pFWNHZ-R6 transgenic lines, stained with the lacZ probe (see methods for details). **N-Q**). Embryos from pFWNHZ-R6 lines double stained with anti-lacZ and anti-Scr probes.

Fig S1

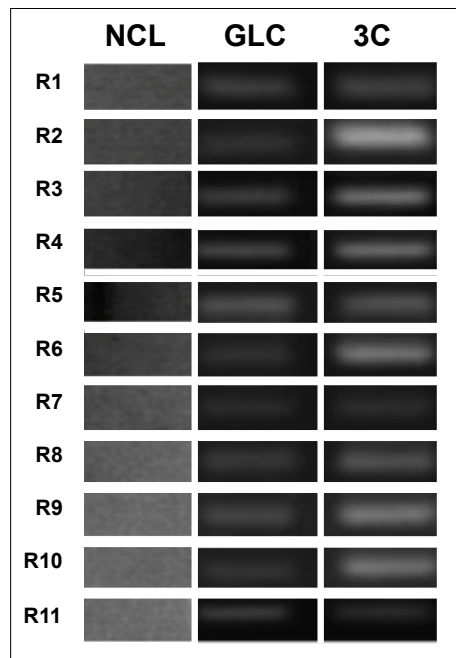



Fig S2

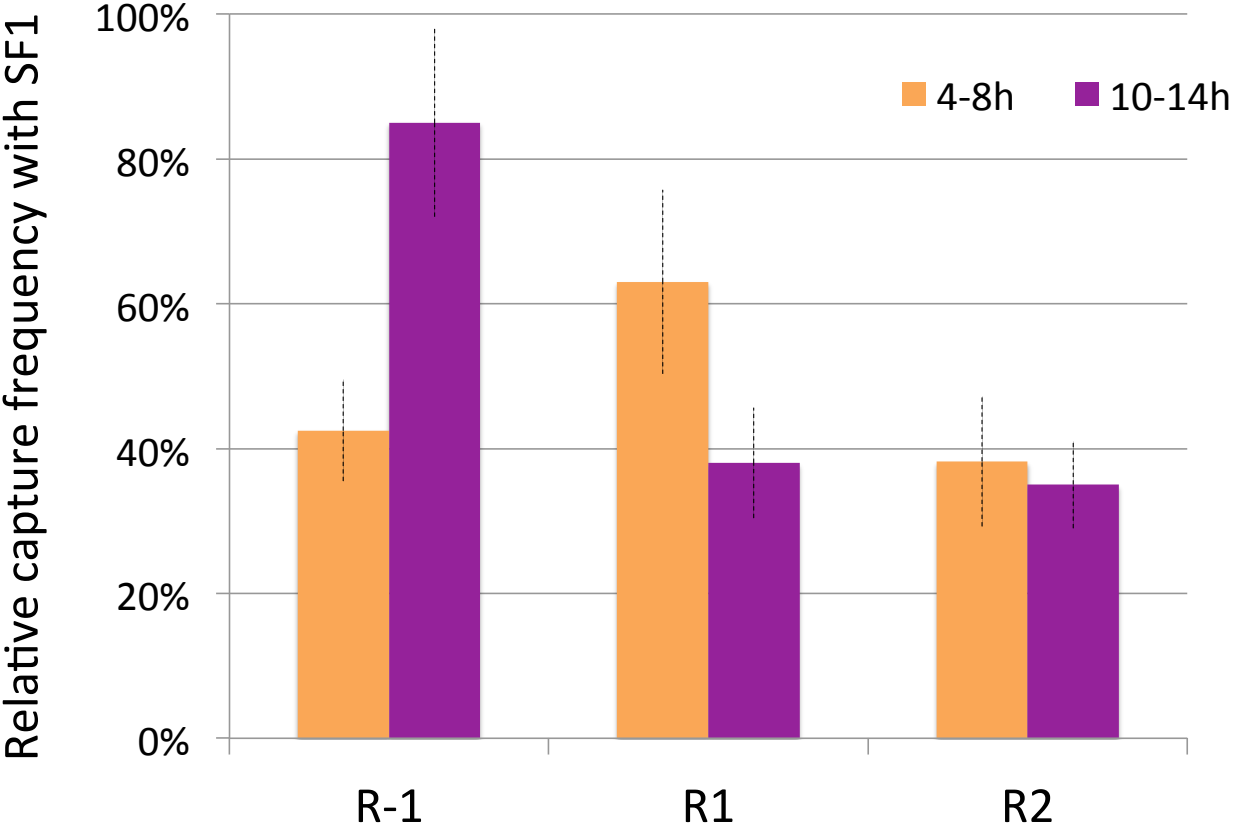

Fig S3

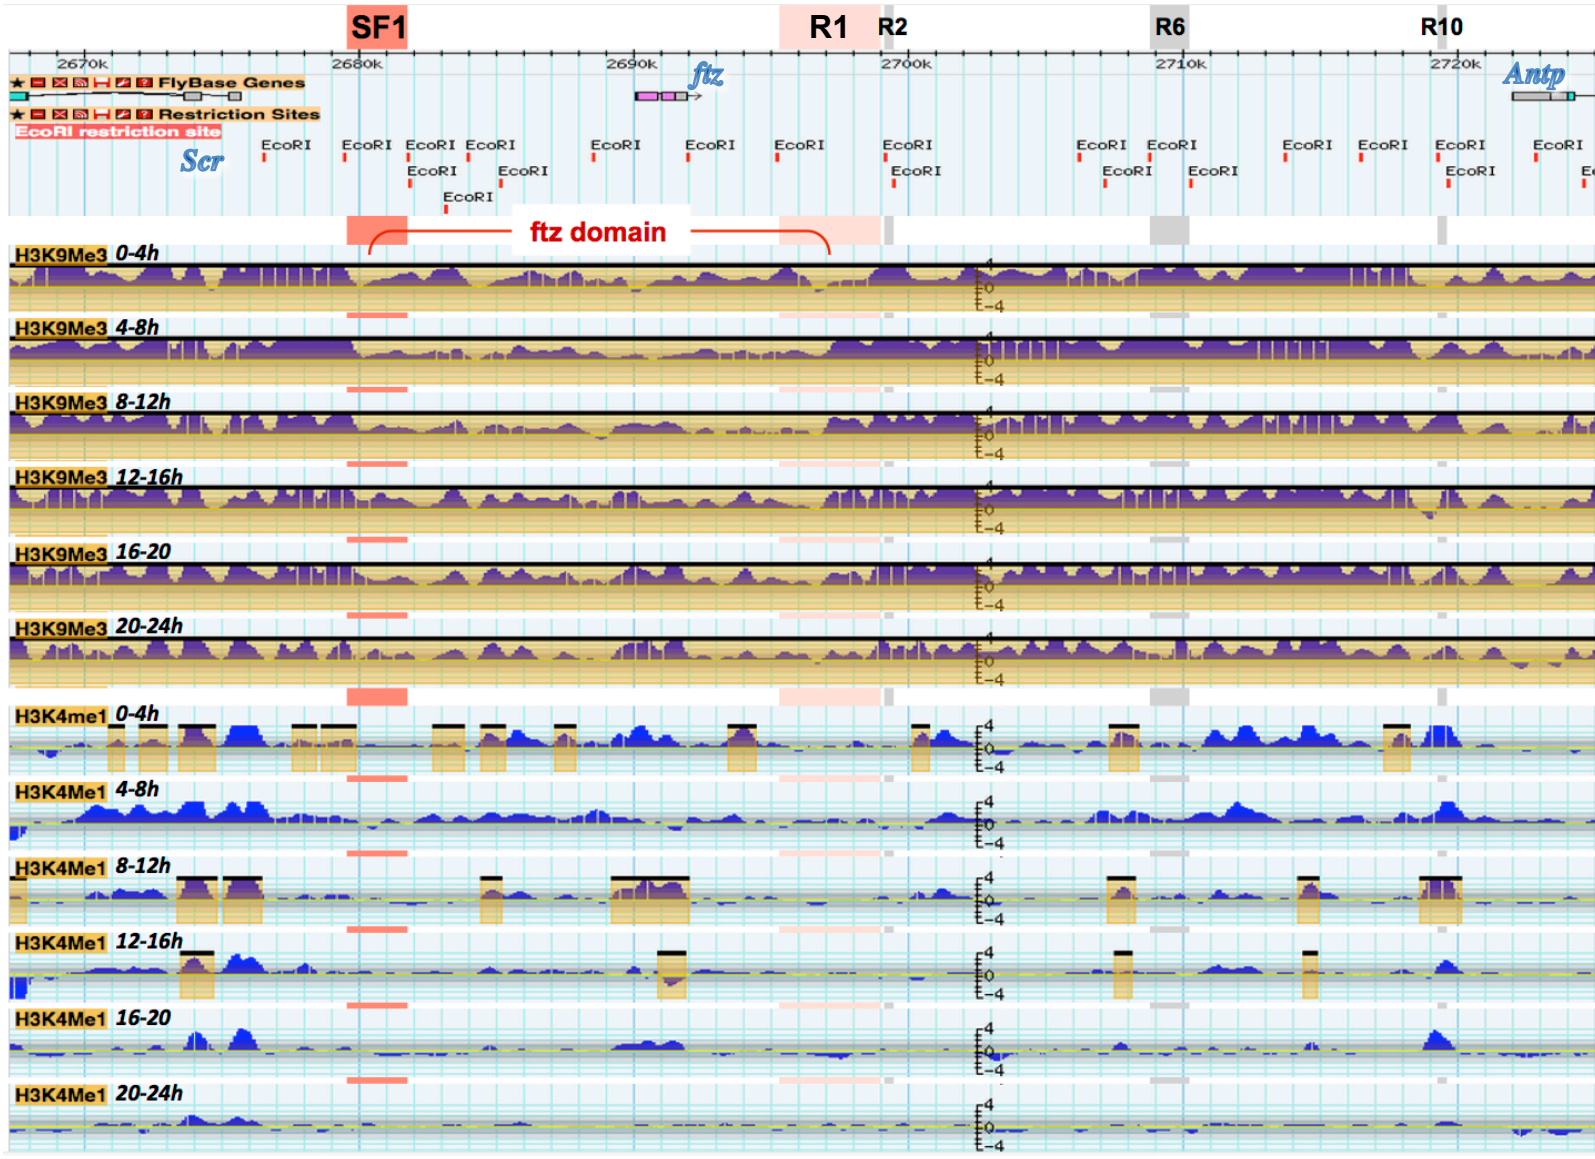

Fig. S4

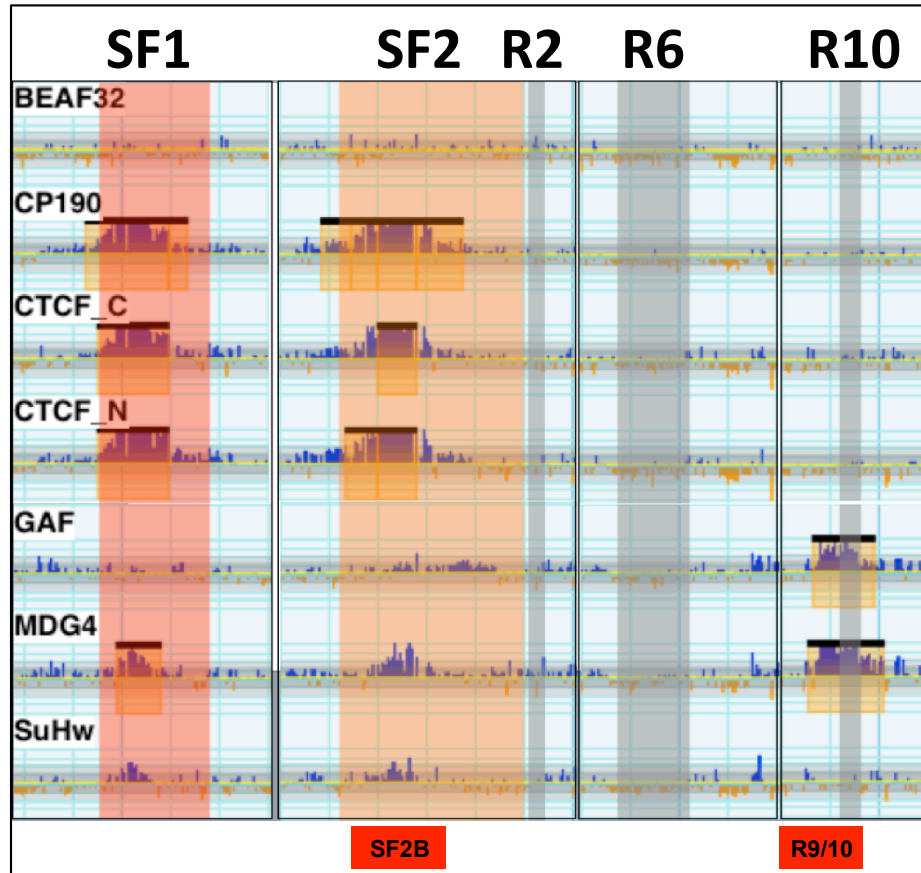

Fig. S5

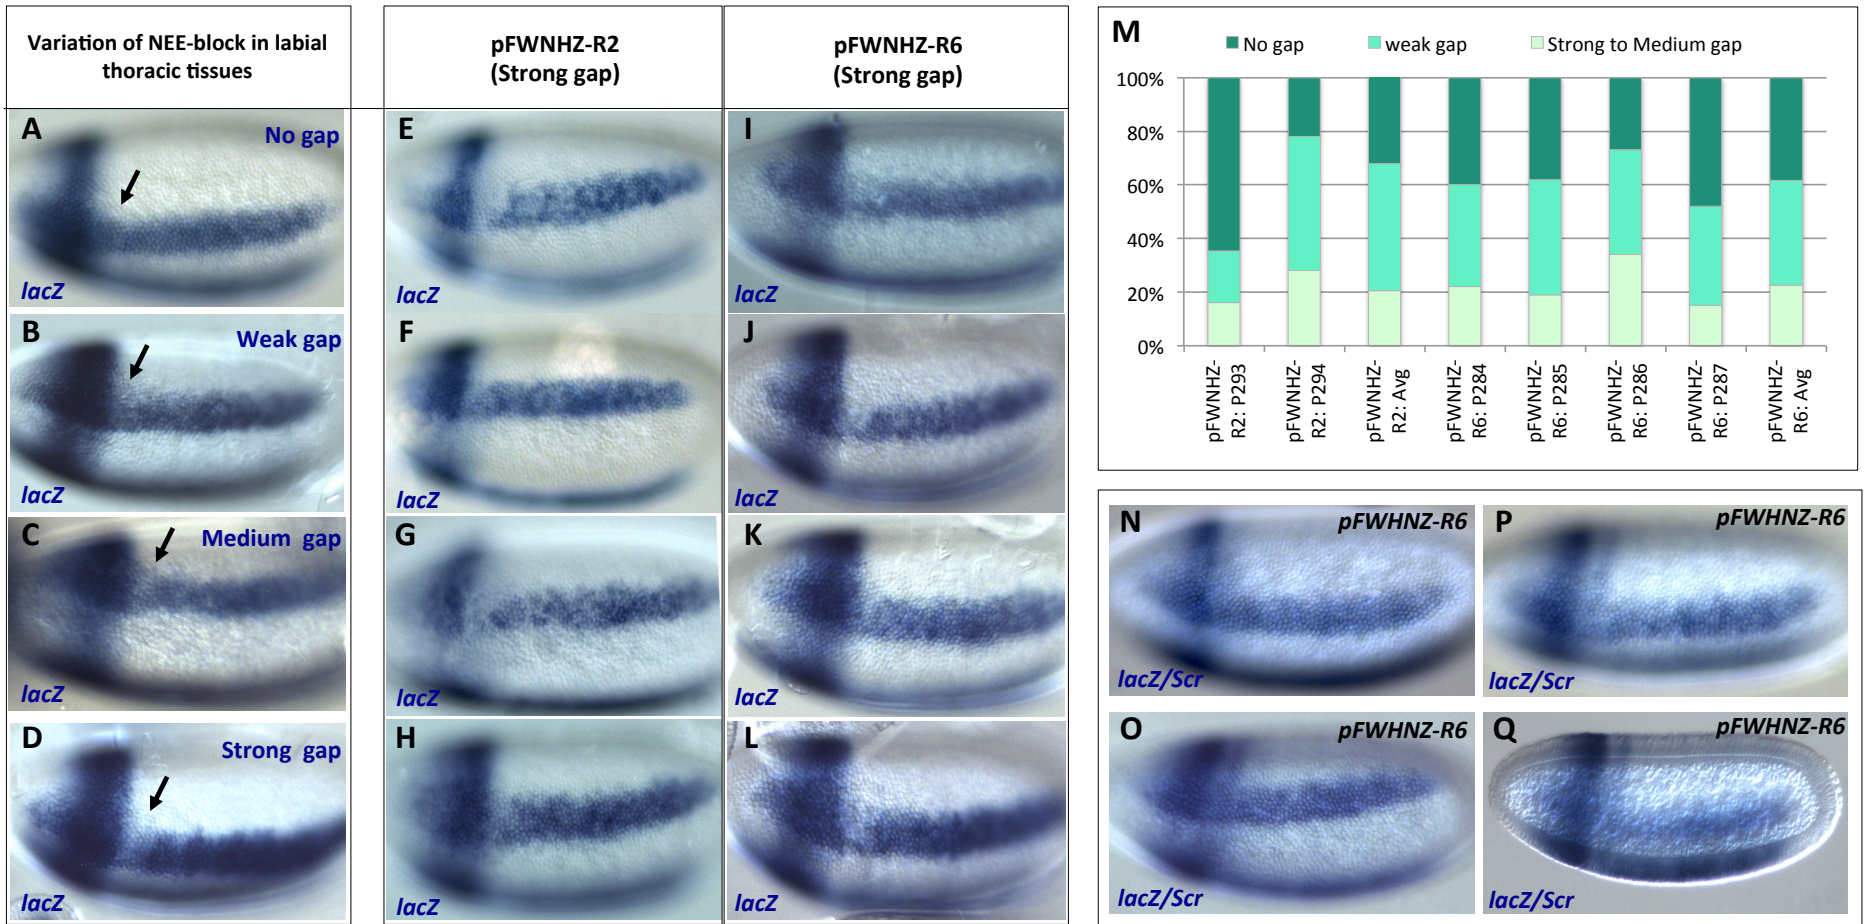

Supplement: MCB.00663-15_zmb999101022so1.pdf [file MCB.00663-15_zmb999101022so1.pdf]
